# Supplementary material
Source: PubMed Central journal article supplement (PMC2753405)
Supplement: NIHMS121733-supplement-1_si_001.pdf [file NIHMS121733-supplement-1_si_001.pdf]

## Supporting Information

Thermodynamics of Bisphosphonate Binding to Human Bone: A Two-Site Model

Sujoy Mukherjee<sup>1</sup>, Cancan Huang<sup>1</sup>, Francisco Guerra<sup>1</sup>, Ke Wang<sup>2</sup> and Eric Oldfield<sup>1,2,\*</sup>

<sup>1</sup>Center for Biophysics & Computational Biology,

University of Illinois at Urbana-Champaign, Urbana, IL 61801, USA;

<sup>2</sup>Department of Chemistry, University of Illinois at Urbana-Champaign, 600 South

Mathews Avenue, Urbana, IL 61801, USA

### Table of Contents

|                                                                                   |        |
|-----------------------------------------------------------------------------------|--------|
| Supporting Methods.....                                                           | S2-S7  |
| Isothermal titration calorimetry .....                                            | S2-S3  |
| $\Delta G$ , $\Delta H$ , and $\Delta S$ prediction .....                         | S3-S7  |
| Supporting Figures.....                                                           | S8     |
| Supporting Tables .....                                                           | S9-S10 |
| Isothermal titration calorimetry results .....                                    | S9     |
| Experimental and computed $\Delta G$ , $\Delta H$ , and $-T\Delta S$ values ..... | S10    |
| Full reference for manuscript.....                                                | S11    |
| Supporting References .....                                                       | S11    |

## Materials & Methods:

### Isothermal titration calorimetry

ITC experiments were performed on a VP-ITC calorimeter (Microcal, Inc., Northampton, MA). Human bone tissue (non-demineralized bone powder, 45-250  $\mu\text{m}$  particle size,) was obtained from the Pacific Coast Tissue Bank (2400 S. Flower St., 5th Floor, Los Angeles, CA, USA. Phone number: 800-745-0034 Fax number: 213-745-3031). Typically, the bisphosphonate samples were made by dissolving 10 mM bisphosphonate in 100 mM PH=7.0 HEPES buffer. The pH of the solution was then readjusted to 7.0. Bone samples were prepared by suspending 50 mg bone in 2 mL 100 mM HEPES buffer at pH=7.0. We calculated the final concentration of bone sample in the calorimeter sample cell as approximately 40.4 mM, based on the observation that bone contains 60% hydroxyapatite (monomer FWt=502 g/mol)<sup>[1]</sup>. Approximately 48 mg bone sample was transferred into the 1.42 mL sample cell, therefore, the final concentration is:

$$\frac{60\% * 48 \text{ mg}}{502 \text{ mg/mmol} * 1.42 \text{ mL}} = 40.4 \text{ mM}$$

All samples and buffers were degassed prior to calorimetry. The ITC experiments were conducted by sequentially titrating 10  $\mu\text{L}$  bisphosphonate sample from a 250  $\mu\text{L}$  syringe (rotating at 460 or 490 rpm) into the 1.42 mL sample cell containing bone at 37  $^{\circ}\text{C}$ . The initial delay was set to 300 s, each injection was 24 s long and was separated by a 300 s delay between injections so that the heat of reaction reached baseline prior to the next injection. Longer delays between injections did not affect the results obtained, consistent with full binding of the bisphosphonates into all accessible sites. For all experiments, the

heats of dilution were obtained just prior to the bone experiments, and were obtained by titrating the bisphosphonate sample into 100 mM HEPES buffer (pH=7.0) using the same ITC parameters. The heat of dilution was then used as a reference, being subtracted from the experiment with bone by using Origin software (from Microcal, Inc., Northampton, MA). The subtraction curves were analyzed by using non-linear regression methods, and could be well fitted using either a one-site binding model (4,6,8,10-12) or a two-site binding model (1-3, 5, 7, and 9) [2].

### Computational approach to $\Delta G$ , $\Delta H$ , and $\Delta S$ prediction:

We treat  $\Delta G$ ,  $\Delta H$ , and  $\Delta S$  for bisphosphonate binding to bone each as a linear combination of variables:

$$\bar{y} = A\bar{x} \quad \text{where} \quad y_i = \sum_{n=1}^N a_{i,n} x_n$$

For example, the total free energy ( $\bar{y}$ ) of binding is a linear combination of the  $\Delta G$  values for:  $\text{NH}_3^+$ ,  $\text{PO}_3(1)$ ,  $\text{PO}_3(2)$  together with OH, and a general hydrophobic side-chain (1-H or phenyl group) term:

$$\Delta G_{Tot} = \sum \Delta G_{individual} = \Delta G_{\text{NH}_3^+} + \Delta G_{\text{PO}_3(1)} + \Delta G_{\text{PO}_3(2)+\text{OH}} + \Delta G_{\text{hydrophobic}}$$

The second  $\text{PO}_3$  and the OH group contribution are not separable (since all compounds that bind to site B have both  $\text{PO}_3(2)$  and the 1-OH group), so we grouped their contributions together as  $\Delta G_{\text{PO}_3(2)+\text{OH}}$ .

Applying a pseudo-binary descriptor linear regression analysis, we searched for the best fit, or linear combination of functional group individual free energies, that can predict the total free energy. The vector and matrix rank data is arranged in the order Site A, then Site B.

$$y = \Delta G_{Tot} = \begin{bmatrix} -6.5 \\ -5.7 \\ -5.4 \\ -5.2 \\ -4.7 \\ -4.9 \\ -5.0 \\ -4.8 \\ -5.6 \\ -5.1 \\ -4.7 \\ -5.1 \\ -10.4 \\ -9.3 \\ -8.4 \\ -7.3 \\ -8.0 \\ -7.7 \end{bmatrix} = \begin{bmatrix} \Delta G \text{ Site A compound 1} \\ \Delta G \text{ Site A compound 2} \\ \Delta G \text{ Site A compound 3} \\ \Delta G \text{ Site A compound 4} \\ \Delta G \text{ Site A compound 5} \\ \Delta G \text{ Site A compound 6} \\ \Delta G \text{ Site A compound 7} \\ \Delta G \text{ Site A compound 8} \\ \Delta G \text{ Site A compound 9} \\ \Delta G \text{ Site A compound 10} \\ \Delta G \text{ Site A compound 11} \\ \Delta G \text{ Site A compound 12} \\ \Delta G \text{ Site B compound 1} \\ \Delta G \text{ Site B compound 2} \\ \Delta G \text{ Site B compound 3} \\ \Delta G \text{ Site B compound 5} \\ \Delta G \text{ Site B compound 7} \\ \Delta G \text{ Site B compound 9} \end{bmatrix}$$

The columns of A are ordered:

$$A = \begin{bmatrix} \Delta G_{NH_3^+} & \Delta G_{1,PO_3} & \Delta G_{2,PO_3+OH} & \Delta G_{hydrophobic} \\ \vdots & \vdots & \vdots & \vdots \\ \vdots & \vdots & \vdots & \vdots \\ \vdots & \vdots & \vdots & \vdots \end{bmatrix}$$

We set A as a pseudo-binary matrix of values, mirroring the relative contribution of each functional group to the total free energy:

$$A = \begin{bmatrix} 1 & 1 & 0 & 0 \\ 1 & 1 & 0 & 0 \\ 0.33 & 1 & 0 & 0 \\ 0.33 & 1 & 0 & 1 \\ 0.03 & 1 & 0 & 0 \\ 0.03 & 1 & 0 & 1 \\ 0.03 & 1 & 0 & 0 \\ 0 & 1 & 0 & 1 \\ 0 & 1 & 0 & 0 \\ 0 & 1 & 0 & 1 \\ 0 & 1 & 0 & 0 \\ 0 & 1 & 0 & 1 \\ 1 & 1 & 1 & 0 \\ 1 & 1 & 1 & 0 \\ 0.33 & 1 & 1 & 0 \\ 0.03 & 1 & 1 & 0 \\ 0.03 & 1 & 1 & 0 \\ 0 & 1 & 1 & 0 \end{bmatrix}$$

in which 1 = an interaction is present, 0 = it is absent.

To take account of the different  $pK_a$  values of the ammonium (**1,2**), imidazolium (**3,4**), and pyridinium (**5,6**) side-chains, we took the ammonium to be fully protonated (1), the pyridiniums to have  $pK_a$  of 6.7 so at  $pH=7$  there is a 0.33 mole fraction of these species present, and the  $pK_a$  of the pyridiniums to be 5.5, resulting in a 0.03 fraction protonated species (at  $pH=7.0$ ), implying that Coulombic interactions of these charged side-chains dominate the bone binding interaction.

Using a multiple linear regression analysis, we determined:

$$\bar{x} = \begin{bmatrix} -1.60 \\ -4.82 \\ -3.06 \\ -0.0538 \end{bmatrix}$$

That is, the relative  $\Delta G$  contributions for each functional group are:

$$\begin{aligned}\text{NH}_3^+ &= -1.60 \\ \text{PO}_3(1) &= -4.82 \\ \text{PO}_3(2) + \text{OH} &= -3.06 \\ \text{hydrophobic} &= -0.0538\end{aligned}$$

Statistics for this regression when applied to all 18 (12 Site A, 6 Site B) compounds are:

$$R^2 = 0.95$$

$$\text{F-value} = 89 \text{ with } p < 0.00001$$

$$\text{Error variance estimate} = 0.19$$

#### **$\Delta H$ and $-T\Delta S$ calculations:**

Using the same pseudo-binary matrix and multiple linear regression methods as used to calculate  $\Delta G$ , we determined the thermodynamic group properties for  $\Delta H$  and  $-T\Delta S$  to be:

$\Delta H$ :

$$\begin{aligned}\text{NH}_3^+ &= -0.0925 \\ \text{PO}_3(1) &= -1.33 \\ \text{PO}_3(2) + \text{OH} &= 2.01 \\ \text{hydrophobic} &= 0.934\end{aligned}$$

$-T\Delta S$ :

$$\begin{aligned}\text{NH}_3^+ &= -1.51 \\ \text{PO}_3(1) &= -3.49 \\ \text{PO}_3(2) + \text{OH} &= -5.07 \\ \text{hydrophobic} &= -0.989\end{aligned}$$

The corresponding statistics for the two ( $\Delta H$ ,  $-T\Delta S$ ) linear regressions were:

$\Delta H$ :

$$R^2 = 0.57$$

$$\text{F-value} = 6.1 \text{ with } p < 0.0070$$

Error variance estimate = 0.71

-TΔS:

$$R^2 = 0.91$$

F-value = 47 with  $p < 0.00001$

Error variance estimate = 0.73

The  $\Delta H$  statistics are worse than the  $\Delta G$ ,  $-T\Delta S$  statistics since the  $\Delta H$  range is smaller.

Eliminating the hydrophobic term had overall no effect on the  $\Delta G$  statistics ( $R^2=0.95$ ),

since  $\Delta H (=0.93 \text{ kcal mol}^{-1}) \approx T\Delta S (0.99 \text{ kcal mol}^{-1})$ .

Figure S1: Isothermal calorimetry results for **1-12** binding to human bone

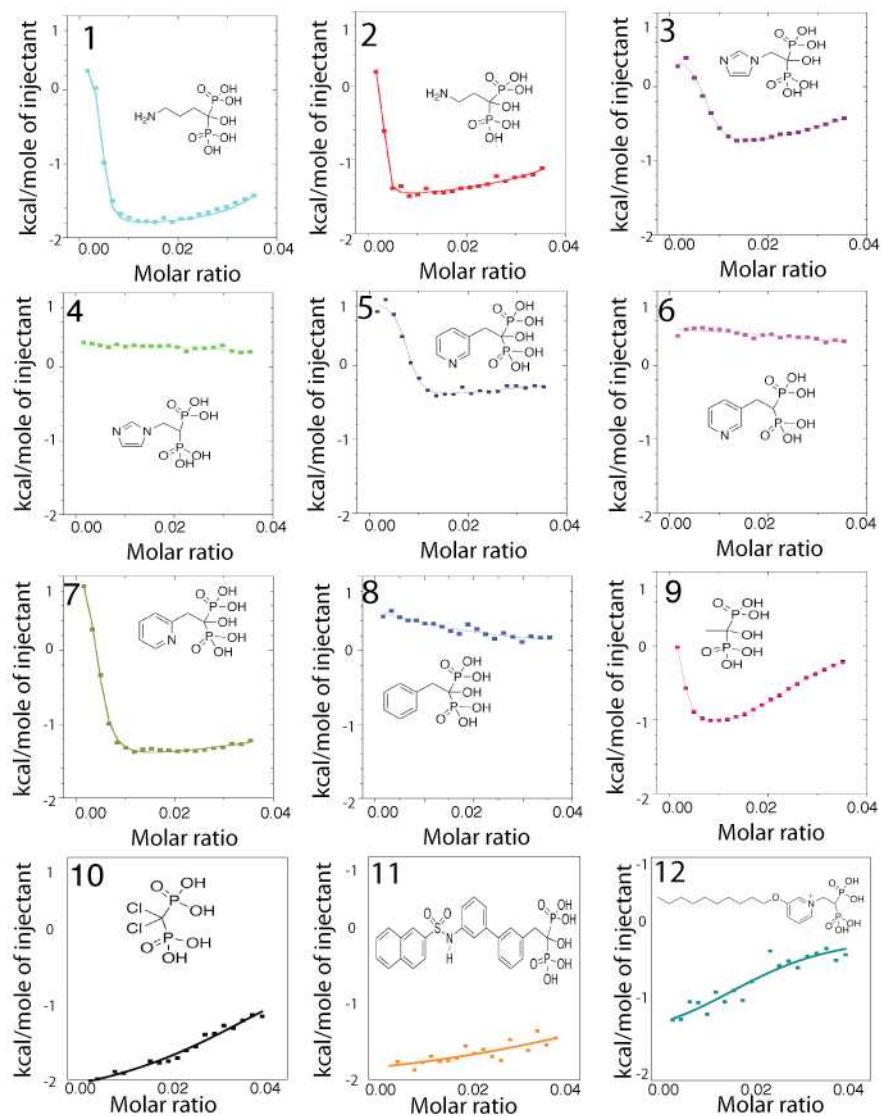

Molar ratio values calculated assuming that bone is 60% hydroxyapatite (monomer FWt = 502 g/mol).



Table S1: Isothermal titration calorimetry results for **1-12** binding to human bone showing  $\Delta G$ ,  $\Delta H$ ,  $\Delta S$ , N (the site occupancy), together with (where applicable) their standard deviations (from two or three independent experiments).

|                              | Site A             |                     |                 |                      | Site B             |                    |                 |                        |
|------------------------------|--------------------|---------------------|-----------------|----------------------|--------------------|--------------------|-----------------|------------------------|
|                              | $\Delta G$         | $\Delta H$          | $\Delta S$      | N1                   | $\Delta G$         | $\Delta H$         | $\Delta S$      | N2                     |
|                              | (kcal/mol)         | (kcal/mol)          | (cal/K/mol)     |                      | (kcal/mol)         | (kcal/mol)         | (cal/K/mol)     |                        |
| <b>1</b> (alendronate)       | -6.5( $\pm$ 0.13)  | -1.7( $\pm$ 0.16)   | 15( $\pm$ 0.94) | 0.040( $\pm$ 0.0035) | -10.4( $\pm$ 0.70) | 0.60( $\pm$ 0.18)  | 35( $\pm$ 2.9)  | 0.0038( $\pm$ 0.00010) |
| <b>2</b> (pamidronate)       | -5.7( $\pm$ 0.072) | -1.4( $\pm$ 0.17)   | 14( $\pm$ 0.78) | 0.040( $\pm$ 0.0085) | -9.3( $\pm$ 0.30)  | 0.41( $\pm$ 0.097) | 31( $\pm$ 0.67) | 0.0022( $\pm$ 0.00034) |
| <b>3</b> (zoledronate)       | -5.4( $\pm$ 0.20)  | -1.0( $\pm$ 0.0035) | 14( $\pm$ 0.67) | 0.034( $\pm$ 0.0032) | -8.4( $\pm$ 0.51)  | 0.54( $\pm$ 0.086) | 29( $\pm$ 1.9)  | 0.0063( $\pm$ 0.0006)  |
| <b>4</b> (deoxyzoledronate)  | -5.2( $\pm$ 0.095) | 0.49( $\pm$ 0.15)   | 18(0.79)        | 0.048( $\pm$ 0.0054) | a                  | a                  | a               | a                      |
| <b>5</b> (risedronate)       | -4.7( $\pm$ 1.0)   | -0.69( $\pm$ 0.44)  | 13( $\pm$ 4.3)  | 0.028( $\pm$ 0.0053) | -7.3( $\pm$ 0.89)  | 0.89( $\pm$ 0.19)  | 27( $\pm$ 2.3)  | 0.0080( $\pm$ 0.0012)  |
| <b>6</b> (deoxyrisedronate)  | -4.9               | 0.56                | 18              | 0.052                | a                  | a                  | a               | a                      |
| <b>7</b> (ortho-risedronate) | -5.0( $\pm$ 0.48)  | -1.3( $\pm$ 0.57)   | 12( $\pm$ 3.3)  | 0.057( $\pm$ 0.036)  | -8.0( $\pm$ 0.23)  | 0.68( $\pm$ 0.63)  | 28( $\pm$ 1.42) | 0.0048( $\pm$ 0.0017)  |
| <b>8</b> (desazarisedronate) | -4.8( $\pm$ 0.48)  | 0.86( $\pm$ 0.36)   | 18( $\pm$ 0.38) | 0.02( $\pm$ 0.0033)  | a                  | a                  | a               | a                      |
| <b>9</b> (etidronate)        | -5.6( $\pm$ 0.17)  | -1.4( $\pm$ 0.13)   | 14(0.95)        | 0.019( $\pm$ 0.0044) | -7.7( $\pm$ 0.37)  | 0.74( $\pm$ 0.088) | 27( $\pm$ 0.90) | 0.0023( $\pm$ 0.00023) |
| <b>10</b> (clodronate)       | -5.1               | -2.4                | 8.7             | 0.040                | a                  | a                  | a               | a                      |
| <b>11</b> (BPH-675)          | -4.7               | -2.1                | 8.4             | 0.078                | a                  | a                  | a               | a                      |
| <b>12</b> (BPH-715)          | -5.1               | -1.6                | 11              | 0.020                | a                  | a                  | a               | a                      |

<sup>a</sup> Second binding site not present

Table S2: Experimental and computed  $\Delta G$ ,  $\Delta H$ , and  $-T\Delta S$  values for **1-12** binding to Sites A, B.

| Compounds | Site | $\Delta G$<br>(expt,<br>kcal) | $\Delta G$<br>(calc,<br>kcal) | $\Delta H$<br>(expt,<br>kcal) | $\Delta H$<br>(calc,<br>kcal) | $-T\Delta S$<br>(expt,<br>kcal) | $-T\Delta S$<br>(calc,<br>kcal) |
|-----------|------|-------------------------------|-------------------------------|-------------------------------|-------------------------------|---------------------------------|---------------------------------|
| <b>1</b>  | A    | -6.4558                       | -6.4199                       | -1.7175                       | -1.4221                       | -4.7384                         | -4.9978                         |
| <b>2</b>  | A    | -5.6842                       | -6.4199                       | -1.4000                       | -1.4221                       | -4.2842                         | -4.9978                         |
| <b>3</b>  | A    | -5.4241                       | -5.3493                       | -1.0035                       | -1.3601                       | -4.4206                         | -3.9894                         |
| <b>4</b>  | A    | -5.1566                       | -5.4032                       | 0.49010                       | -0.42620                      | -5.6466                         | -4.9782                         |
| <b>5</b>  | A    | -4.6985                       | -4.8700                       | -0.69330                      | -1.3323                       | -4.0052                         | -3.5379                         |
| <b>6</b>  | A    | -4.8800                       | -4.9238                       | 0.56000                       | -0.39850                      | -5.4467                         | -4.5266                         |
| <b>7</b>  | A    | -5.0015                       | -4.8700                       | -1.2517                       | -1.3323                       | -3.7499                         | -3.5379                         |
| <b>8</b>  | A    | -4.7671                       | -4.8759                       | 0.86400                       | -0.39570                      | -5.6311                         | -4.4815                         |
| <b>9</b>  | A    | -5.6040                       | -4.8221                       | -1.3730                       | -1.3296                       | -4.2315                         | -3.4927                         |
| <b>10</b> | A    | -5.0560                       | -4.8759                       | -2.3650                       | -0.39570                      | -2.6908                         | -4.4815                         |
| <b>11</b> | A    | -4.7050                       | -4.8221                       | -2.0890                       | -1.3296                       | -2.6164                         | -3.4927                         |
| <b>12</b> | A    | -5.0950                       | -4.8759                       | -1.5610                       | -0.39570                      | -3.5340                         | -4.4815                         |
| <b>1</b>  | B    | -10.406                       | -9.4841                       | 0.59550                       | 0.58570                       | -11.002                         | -10.070                         |
| <b>2</b>  | B    | -9.3487                       | -9.4841                       | 0.40700                       | 0.58570                       | -9.7557                         | -10.070                         |
| <b>3</b>  | B    | -8.3762                       | -8.4135                       | 0.54300                       | 0.64760                       | -8.9187                         | -9.0611                         |
| <b>5</b>  | B    | -7.3342                       | -7.9342                       | 0.88600                       | 0.67540                       | -8.2202                         | -8.6096                         |
| <b>7</b>  | B    | -8.0108                       | -7.9342                       | 0.67540                       | 0.67540                       | -8.6862                         | -8.6096                         |
| <b>9</b>  | B    | -7.6600                       | -7.8863                       | 0.74100                       | 0.67820                       | -8.4010                         | -8.5644                         |

### Full reference for references 7 and 11 in the manuscript:

7. Gnant, M.; Mlineritsch, B.; Schippinger, W.; Luschin-Ebengreuth, G.; Postlberger, S.; Menzel, C.; Jakesz, R.; Seifert, M.; Hubalek, M.; Bjelic-Radisic, V.; Samonigg, H.; Tausch, C.; Eidtmann, H.; Steger, G.; Kwasny, W.; Dubsky, P.; Fridrik, M.; Fitzal, F.; Stierer, M.; Rucklinger, E.; Greil, R.; Marth, C., *N. Engl. J. Med.* **2009**, 360, (7), 679-91.
11. Zhang, Y.; Cao, R.; Yin, F.; Hudock, M. P.; Guo, R. T.; Krysiak, K.; Mukherjee, S.; Gao, Y. G.; Robinson, H.; Song, Y.; No, J. H.; Bergan, K.; Leon, A.; Cass, L.; Goddard, A.; Chang, T. K.; Lin, F. Y.; Van Beek, E.; Papapoulos, S.; Wang, A. H.; Kubo, T.; Ochi, M.; Mukkamala, D.; Oldfield, E., Lipophilic bisphosphonates as dual farnesyl/geranylgeranyl diphosphate synthase inhibitors: an X-ray and NMR investigation. *J Am Chem Soc* **2009**, 131, (14), 5153-62.

### Supporting References

1. Aerssens, J.; Boonen, S.; Lowet, G.; Dequeker, J., Interspecies differences in bone composition, density, and quality: Potential implications for *in vivo* bone research. *Endocrinology* **1998**, 139, (2), 663-670.
2. Velázquez-Campoy A, O. H., Nezami A, Muzammil S, Freire E., Isothermal titration calorimetry. *Curr. Protoc. Cell Biol.* **2004**, Chapter 17, (Unit 17.8).
